# Supplementary material
Source: ML conference proceedings conference paper supplement (https://proceedings.neurips.cc/paper_files/paper/2008/hash/8f7d807e1f53eff5f9efbe5cb81090fb-Abstract.html)
Supplement: Supplementary file 1 [file 8f7d807e1f53eff5f9efbe5cb81090fb-Supplemental.zip]

Archive with 1 entries (1 files):
- addendum_relative.pdf
